# Supplementary material for: Nurses’ experiences with continuous vital sign monitoring on the general surgical ward: a qualitative study based on the Behaviour Change Wheel
Source: PubMed Central journal article supplement (PMC8919550; doi:10.1186/s12912-022-00837-x), 2022-03-14
Supplement: 12912_2022_837_MOESM1_ESM.pdf [file 12912_2022_837_MOESM1_ESM.pdf]

**Additional File 1: Interview guide (translated from Dutch)**

| <b>CAPABILITY</b>                              |                                                                                                                                                                                                                                                                                                                                          |
|------------------------------------------------|------------------------------------------------------------------------------------------------------------------------------------------------------------------------------------------------------------------------------------------------------------------------------------------------------------------------------------------|
| Psychological Capability                       |                                                                                                                                                                                                                                                                                                                                          |
| <i>Knowledge</i>                               | Did you have sufficient understanding of the possible benefits of continuous monitoring?<br>Were you familiar with any guidelines or policies during the study? Can you describe what the guidelines or policies say?                                                                                                                    |
| <i>Behavioural Regulation</i>                  | What do you think is needed to ensure that you consistently provide continuous monitoring to patients?                                                                                                                                                                                                                                   |
| <i>Memory, Attention, and Decision Process</i> | Are there situations when you think it would be difficult to provide continuous monitoring to patients? (prompt – can you tell me what it is about these situations that make it difficult)                                                                                                                                              |
| Physical Capability                            |                                                                                                                                                                                                                                                                                                                                          |
| <i>Skills</i>                                  | Did you feel you have the skills to provide effective continuous monitoring to patients?<br>(prompt –are there any other skills that you need?)<br>What skills do you think are needed to provide effective continuous monitoring to patients?                                                                                           |
| <b>OPPORTUNITY</b>                             |                                                                                                                                                                                                                                                                                                                                          |
| Social Opportunity                             |                                                                                                                                                                                                                                                                                                                                          |
| <i>Social influences</i>                       | Did you ever discuss continuous monitoring or policies with other nurses at your ward?<br>Did other nurses at your ward influence your decision to provide continuous monitoring to patients? How would they influence your practice? To what extent?<br>Do your colleagues value providing effective continuous monitoring to patients? |
| Physical Opportunity                           |                                                                                                                                                                                                                                                                                                                                          |
| <i>Environmental Context and Resources</i>     | What factors outside of your professional/practice environment influenced your ability to provide more effective continuous monitoring?<br>Were there competing tasks or time constraints that would influence your ability to provide more effective continuous monitoring?                                                             |

| <b>MOTIVATION</b>                            |                                                                                                                                                                                                                                                                                                                                             |
|----------------------------------------------|---------------------------------------------------------------------------------------------------------------------------------------------------------------------------------------------------------------------------------------------------------------------------------------------------------------------------------------------|
| <b>Automatic Motivation</b>                  |                                                                                                                                                                                                                                                                                                                                             |
| <i>Reinforcement</i>                         | Were there any incentives for you to provide continuous monitoring? What are they?<br>When you provide continuous monitoring to patients do you feel like you are making a difference? Why or why not?                                                                                                                                      |
| <i>Emotion</i>                               | Does discussing continuous monitoring ever evoke an emotional response in you? (prompt – would you feel worried or concerned about providing continuous monitoring?)<br>Thinking about yourself and how you normally feel as a professional that works with patients, to what extent do you feel inspired to provide continuous monitoring? |
| <b>Reflective Motivation</b>                 |                                                                                                                                                                                                                                                                                                                                             |
| <i>Social/Professional Role And Identity</i> | What responsibilities did you have as a nurse to provide continuous monitoring at the ward?<br>How was continuous monitoring consistent or inconsistent with your profession?<br>How compatible was the provision of continuous monitoring with your profession?                                                                            |
| <i>Beliefs About Capabilities</i>            | How confident did you feel in your ability to work with continuous monitoring at your ward?<br>How easy or difficult was it to provide continuous monitoring at your ward to patients?<br>What would made it easy or difficult for you?                                                                                                     |
| <i>Beliefs about Consequences</i>            | Do you find continuous monitoring at your wards useful?                                                                                                                                                                                                                                                                                     |
| <i>Optimism</i>                              | How optimistic are you about the future of continuous monitoring on the general surgical ward?                                                                                                                                                                                                                                              |
| <i>Intentions</i>                            | On a scale of 1 to 10 and 10 being very important, how important do you think it is for you to provide continuous monitoring to patients at your hospital? Why?                                                                                                                                                                             |
| <i>Goals</i>                                 | Would the goal of improving and implementation continuous monitoring at your wards be compatible with your usual practice? Why?                                                                                                                                                                                                             |
